# Supplementary material
Source: publisher figshare collection journal article supplement (https://karger.figshare.com/ndownloader/files/17785334)
Supplement: Supplementary file 1 [file 17785334]

## Supplementary Material: Appendix 3 – Results: Safety

**Supplementary Table S3.** Adverse events (AEs) observed in <10% during imatinib therapy in patients with GIST in the adjuvant setting at 400 mg daily

| Patients/AEs                   | Grade |                |     |                |    |                |
|--------------------------------|-------|----------------|-----|----------------|----|----------------|
|                                | All   |                | ≤2  |                | >2 |                |
|                                | N     | % <sup>a</sup> | N   | % <sup>a</sup> | N  | % <sup>a</sup> |
| Total patients                 | 300   | 100            |     |                |    |                |
| Patients with AEs <sup>b</sup> | 272   | 91             | 227 | 76             | 45 | 15             |
| Anemia                         | 28    | 9              | 27  | 9              | 1  | 0.3            |
| Vomiting                       | 27    | 9              | 27  | 9              | 0  | 0              |
| Decreased appetite             | 22    | 7              | 22  | 7              | 0  | 0              |
| Dyspepsia                      | 22    | 7              | 22  | 7              | 0  | 0              |
| Edema                          | 19    | 6              | 19  | 6              | 0  | 0              |
| Leukopenia                     | 18    | 6              | 16  | 5              | 2  | 0.7            |
| Neutropenia                    | 18    | 6              | 14  | 5              | 4  | 1              |
| Lacrimation increased          | 18    | 6              | 18  | 6              | 0  | 0              |
| Constipation                   | 17    | 6              | 17  | 6              | 0  | 0              |
| Upper abdominal pain           | 15    | 5              | 14  | 5              | 1  | 0.3            |
| Nasopharyngitis                | 15    | 5              | 15  | 5              | 0  | 0              |
| Alopecia                       | 15    | 5              | 15  | 5              | NA | NA             |

<sup>a</sup>Percentages may not add up to 100 due to rounding.

<sup>b</sup>Data were missing in 28 patients (9%).

<sup>c</sup>AEs occurring at an incidence of <10%, sorted by decreasing incidence.

NA not applicable
